# Supplementary material for: Development of a simple and efficient two-step microwave-assisted digestion method for the determination of REEs, HFSEs and other elements in granite samples by ICP-OES
Source: Royal Society of Chemistry journal article supplement (doi:10.1039/d4ja00166d), 2024-01-01

**Development of a simple and efficient two-step microwave-assisted digestion method for the determination of REEs, HFSEs and other elements in granite samples by ICP-OES**

Chandrasekaran Krishnan<sup>a</sup>, Venkata Balarama Krishna Mullapudi<sup>a\*</sup>, Venkateswarlu Gumma<sup>a</sup>, Johnson George<sup>b</sup> and Beena Sunilkumar<sup>b</sup>

<sup>a</sup>National Centre for Compositional Characterization of Materials (NCCCM.),  
Bhabha Atomic Research Centre, Department of Atomic Energy,  
Hyderabad – 500 062, INDIA

<sup>b</sup>Atomic Minerals Directorate for Exploration and Research (AMDER),  
Department of Atomic Energy, AMD Complex, Begumpet, Hyderabad-500 016 INDIA

**Table A1: Spectral lines of REEs, HFSEs and other elements tested in different types of granite samples by ICP-OES analysis, response functions along with limit of detection (LOD)**

| Element                                     | Selected spectral lines (nm) | Response function and Correlation coefficient (R <sup>2</sup> ) | LOD (mg/kg) |
|---------------------------------------------|------------------------------|-----------------------------------------------------------------|-------------|
| <b>Rare earth elements (REEs)</b>           |                              |                                                                 |             |
| La                                          | 333.749                      | $y = 522079x - 344$ and $R^2 = 0.9999$                          | 0.04        |
| Ce                                          | 418.660                      | $y = 347311x - 3876$ and $R^2 = 0.9998$                         | 0.01        |
| Nd                                          | 430.357                      | $y = 292761x - 536$ and $R^2 = 0.9998$                          | 0.02        |
| Sm                                          | 359.262                      | $y = 370955x - 4050$ and $R^2 = 0.9997$                         | 0.04        |
| Eu                                          | 381.966                      | $y = 3508926x - 115$ and $R^2 = 0.9998$                         | 0.03        |
| Gd                                          | 342.246                      | $y = 458225x - 2022$ and $R^2 = 0.9999$                         | 0.01        |
| Dy                                          | 353.170                      | $y = 2550620x - 5965$ and $R^2 = 0.9999$                        | 0.03        |
| Er                                          | 349.910                      | $y = 1829864x - 12973$ and $R^2 = 0.9997$                       | 0.08        |
| Yb                                          | 328.937                      | $y = 5436414x - 2198$ and $R^2 = 0.9999$                        | 0.02        |
| Sc                                          | 361.384                      | $y = 540435x + 23$ and $R^2 = 0.9999$                           | 0.06        |
| Y                                           | 371.029                      | $y = 564937x + 62$ and $R^2 = 0.9999$                           | 0.09        |
| <b>High field strength elements (HFSEs)</b> |                              |                                                                 |             |
| Ti                                          | 334.941                      | $y = 269366x - 2834$ and $R^2 = 0.9999$                         | 0.08        |
| Zr                                          | 343.823                      | $y = 244842x - 1489$ and $R^2 = 0.9999$                         | 0.11        |
| Nb                                          | 316.340                      | $y = 211645x - 5437$ and $R^2 = 0.9999$                         | 0.06        |
| Hf                                          | 264.141                      | $y = 199997x + 216$ and $R^2 = 0.9999$                          | 0.12        |
| Th                                          | 401.913                      | $y = 137611x - 5142$ and $R^2 = 0.9998$                         | 0.02        |
| <b>Other elements</b>                       |                              |                                                                 |             |
| Al                                          | 396.152                      | $y = 33046x + 5635$ and $R^2 = 0.9999$                          | 0.8         |
| Ca                                          | 393.366                      | $y = 817466x + 157439$ and $R^2 = 0.9999$                       | 0.2         |
| Fe                                          | 238.204                      | $y = 192632x + 34027$ and $R^2 = 0.9998$                        | 0.3         |
| Sr                                          | 407.771                      | $y = 2878285x - 8941$ and $R^2 = 0.9999$                        | 0.04        |
| Ba                                          | 230.424                      | $y = 261891x + 2280$ and $R^2 = 0.9999$                         | 0.5         |

**Fig A1: EDS spectrum of residual solid obtained after first step of microwave digestion (MWD-1) and evaporation step (ES).**

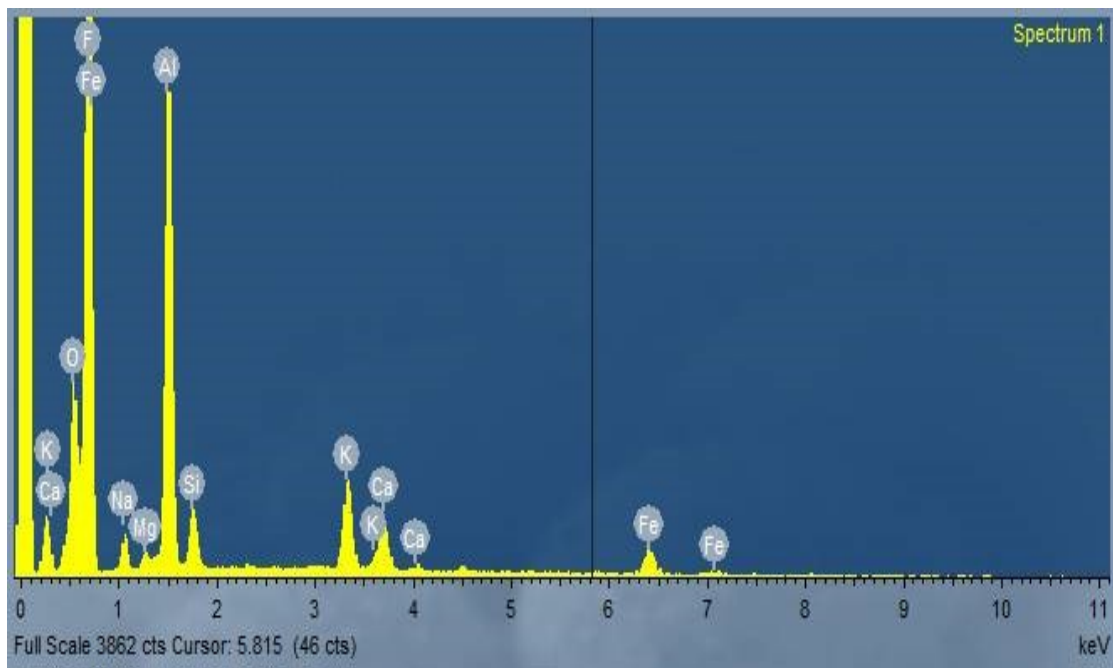

Supplement: d4ja00166d1.pdf [file d4ja00166d1.pdf]
